# MIND TO MIND

*Creative writing that explores the abstract side  
of our profession and our lives*

*Stephen T. Harvey, M.D., Editor*

## Still Beauty

Allison L. Thoeny, M.D.

H he was a part  
of you  
sinew blood  
and tissue

a lifeline  
denied  
red-blue river  
dried within  
twisted cords  
still beauty  
swaddled

tip toes  
and apologies  
distract yet  
the quiet  
returns

pump acceleration  
hardly contained within  
osseous cage  
as I answer  
the call

nerves bathed  
in anesthetic  
numb contracting  
muscles  
but certainly not  
the pain

you tell me  
you feel empty  
because  
he was a part  
of you  
sinew blood  
and tissue

From the University of California, San Francisco, California. allison.thoeny@gmail.com

Accepted for publication July 12, 2017.

Permission to reprint granted to the American Society of Anesthesiologists, Inc., and Wolters Kluwer Health, Inc., by copyright author/owner.  
Anesthesiology 2017; 127:893
